# Supplementary material for: Epitope-based universal vaccine for Human T-lymphotropic virus-1 (HTLV-1)
Source: PubMed Central journal article supplement (PMC8018625; doi:10.1371/journal.pone.0248001), 2021-04-02
Supplement: pone.0248001.s002.pdf [file pone.0248001.s002.pdf]

## Minimal Data Set

**Table S2:** T cell epitope

| MHC class I epitopes with IC50<200 |       |     |            |             |      |
|------------------------------------|-------|-----|------------|-------------|------|
| allele                             | start | end | epitope    | IC50        | rank |
| HLA-A*02:02                        | 11    | 19  | LLFGYPVYV  | 2.089344239 | 0.2  |
| HLA-A*02:01                        | 11    | 19  | LLFGYPVYV  | 2.444049514 | 0.2  |
| HLA-A*02:06                        | 297   | 305 | IQYSSFHSL  | 7.15401753  | 0.3  |
| HLA-A*02:06                        | 163   | 171 | ITWPLLPHV  | 7.422496475 | 0.3  |
| HLA-A*02:01                        | 155   | 163 | YLYQLSPPI  | 7.693252737 | 0.2  |
| HLA-B*08:01                        | 37    | 45  | SARLHRHAL  | 9.301435953 | 0.2  |
| HLA-A*02:06                        | 70    | 78  | FLIPRLPSF  | 10.19882172 | 0.4  |
| HLA-B*07:02                        | 37    | 45  | SARLHRHAL  | 12.18680887 | 0.2  |
| HLA-A*02:02                        | 178   | 186 | QLGAFITNV  | 13.80416049 | 0.5  |
| HLA-A*02:06                        | 177   | 185 | GQLGAFITN  | 22.51904662 | 0.8  |
| HLA-A*02:02                        | 307   | 315 | LLFEEY TNI | 23.87866265 | 0.9  |
| HLA-A*02:02                        | 155   | 163 | YLYQLSPPI  | 24.49119634 | 0.9  |
| HLA-A*02:06                        | 11    | 19  | LLFGYPVYV  | 24.80561506 | 0.8  |
| HLA-A*02:06                        | 155   | 163 | YLYQLSPPI  | 26.27544016 | 0.9  |
| HLA-B*07:02                        | 72    | 80  | IPRLPSFPT  | 32.80122022 | 0.3  |
| HLA-A*02:01                        | 163   | 171 | ITWPLLPHV  | 39.45572246 | 0.7  |
| HLA-A*02:02                        | 70    | 78  | FLIPRLPSF  | 54.07667744 | 1.9  |
| HLA-B*08:01                        | 107   | 115 | QAMRKYS PF | 54.89717547 | 0.2  |
| HLA-B*39:01                        | 297   | 305 | IQYSSFHSL  | 55.00472529 | 0.4  |
| HLA-B*58:01                        | 222   | 230 | RAPVTLTAW  | 56.2729911  | 0.5  |
| HLA-A*02:06                        | 144   | 152 | YTLWGGSVV  | 61.31263769 | 2    |
| HLA-B*58:01                        | 284   | 292 | KAYHPSFLL  | 64.16526615 | 0.5  |
| HLA-B*07:02                        | 175   | 183 | HPGQLGAF L | 66.81746579 | 0.5  |
| HLA-A*02:02                        | 67    | 75  | ALQFLIPRL  | 68.39273951 | 2.4  |
| HLA-B*58:01                        | 198   | 206 | ISLTTGALI  | 72.32692478 | 0.5  |
| HLA-A*02:06                        | 218   | 226 | FQPARAPVT  | 75.08444933 | 2.5  |

|             |     |     |           |             |     |
|-------------|-----|-----|-----------|-------------|-----|
| HLA-B*58:01 | 62  | 70  | RVIGSALQF | 77.32145183 | 0.6 |
| HLA-A*02:01 | 307 | 315 | LLFEEYTNI | 78.00276543 | 1.4 |
| HLA-B*39:01 | 219 | 227 | QPARAPVTL | 79.14072054 | 0.5 |
| HLA-A*02:01 | 178 | 186 | QLGAFLTNV | 79.45294511 | 1.4 |
| HLA-A*02:06 | 281 | 289 | FQTKAYHPS | 81.76171642 | 2.7 |
| HLA-A*02:01 | 67  | 75  | ALQFLIPRL | 84.54929682 | 1.4 |
| HLA-B*07:02 | 219 | 227 | QPARAPVTL | 85.48501653 | 0.6 |
| HLA-A*02:02 | 226 | 234 | TLTAWQNGL | 102.8039969 | 3.6 |
| HLA-B*27:05 | 38  | 46  | ARLHRHALL | 104.6092287 | 0.4 |
| HLA-A*02:01 | 70  | 78  | FLIPRLPSF | 106.4412583 | 1.7 |
| HLA-A*03:01 | 276 | 284 | FIFHKFQTK | 114.2352141 | 0.5 |
| HLA-B*08:01 | 70  | 78  | FLIPRLPSF | 114.4326618 | 0.4 |
| HLA-A*02:02 | 297 | 305 | IQYSSFHSL | 115.6138863 | 3.9 |
| HLA-A*02:06 | 159 | 167 | LSPPITWPL | 117.6386413 | 3.7 |
| HLA-A*02:06 | 178 | 186 | QLGAFLTNV | 125.1843389 | 3.9 |
| HLA-B*07:02 | 4   | 12  | FPGFGQSL  | 127.9057298 | 0.8 |
| HLA-A*02:02 | 64  | 72  | IGSALQFLI | 127.9410763 | 4.2 |
| HLA-A*02:02 | 233 | 241 | GLLPFHSTL | 128.8279215 | 4.2 |
| HLA-A*02:02 | 13  | 21  | FGYPVYVFG | 129.1249005 | 4.2 |
| HLA-A*02:02 | 151 | 159 | VVCMYLYQL | 129.4225642 | 4.3 |
| HLA-B*07:02 | 186 | 194 | VPYKRIEEL | 129.6850757 | 0.8 |
| HLA-A*02:01 | 233 | 241 | GLLPFHSTL | 131.8590675 | 2   |
| HLA-B*07:02 | 101 | 109 | IPPSFLQAM | 134.8621255 | 0.8 |
| HLA-A*02:06 | 13  | 21  | FGYPVYVFG | 135.3785942 | 4.2 |
| HLA-A*02:02 | 158 | 166 | QLSPPITWP | 145.8847851 | 4.7 |
| HLA-B*27:05 | 189 | 197 | KRIEELLYK | 147.7644631 | 0.5 |
| HLA-A*02:02 | 300 | 308 | SSFHSLHLL | 149.9719367 | 4.8 |
| HLA-A*02:02 | 123 | 131 | TLGQHLPTL | 151.35961   | 4.8 |
| HLA-A*02:02 | 63  | 71  | VIGSALQFL | 153.4652319 | 4.9 |
| HLA-A*02:06 | 230 | 238 | WQNGLLPFH | 156.8736495 | 4.8 |
| HLA-A*02:02 | 159 | 167 | LSPPITWPL | 157.0398964 | 4.9 |

|             |     |     |           |             |     |
|-------------|-----|-----|-----------|-------------|-----|
| HLA-A*24:02 | 164 | 172 | TWPLLPHVI | 158.7193952 | 0.3 |
| HLA-B*58:01 | 64  | 72  | IGSALQFLI | 161.9198154 | 1   |
| HLA-A*02:06 | 284 | 292 | KAYHPSFLL | 162.760869  | 4.9 |
| HLA-A*02:06 | 269 | 277 | LVLQSSSFI | 164.2668768 | 4.9 |
| HLA-A*02:06 | 307 | 315 | LLFEEYTNI | 165.4055204 | 5   |
| HLA-A*02:02 | 299 | 307 | YSSFHSLHL | 171.7947944 | 5.2 |
| HLA-A*02:06 | 151 | 159 | VVCMYLYQL | 172.8024915 | 5.1 |
| HLA-A*02:01 | 151 | 159 | VVCMYLYQL | 175.0289954 | 2.5 |
| HLA-A*02:06 | 85  | 93  | KTLKVLTPP | 182.6206987 | 5.3 |
| HLA-A*02:02 | 312 | 320 | YTNIPISLL | 184.5057903 | 5.4 |
| HLA-A*02:02 | 127 | 135 | HLPTLSFPD | 189.6749595 | 5.5 |
| HLA-A*02:02 | 130 | 138 | TLSFPDPGL | 191.4300003 | 5.6 |
| HLA-B*07:02 | 261 | 269 | CPKDGQPSL | 193.5931561 | 1   |
| HLA-A*02:01 | 297 | 305 | IQYSSFHSL | 196.3857628 | 2.7 |
| HLA-A*02:06 | 271 | 279 | LQSSSFIFH | 197.9474904 | 5.7 |
| HLA-A*02:06 | 9   | 17  | QSLFLGYPV | 198.4038065 | 5.7 |

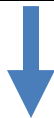

| MHC class I epitopes with IC50<200 interacting with multiple MHC class I alleles |        |                      |         |                          |  |
|----------------------------------------------------------------------------------|--------|----------------------|---------|--------------------------|--|
| peptide                                                                          | length | immunogenicity score |         | antigenicity             |  |
| LSPPITWPL                                                                        | 9      | 0.33184              | 0.3466  | ( Probable NON-ANTIGEN ) |  |
| LLFEEYTNI                                                                        | 9      | 0.26175              | 0.4534  | ( Probable ANTIGEN )     |  |
| ALQFLIPRL                                                                        | 9      | 0.21556              | -0.3361 | ( Probable NON-ANTIGEN ) |  |
| QLGAFLTNV                                                                        | 9      | 0.18291              | 0.4664  | ( Probable ANTIGEN )     |  |
| QPARAPVTL                                                                        | 9      | 0.14996              | 0.2750  | ( Probable NON-ANTIGEN ) |  |
| SARLHRHAL                                                                        | 9      | 0.13602              | -0.0517 | ( Probable NON-ANTIGEN ) |  |
| FGYPVYVFG                                                                        | 9      | 0.1276               | -0.4248 | ( Probable NON-ANTIGEN ) |  |
| LLFGYPVYV                                                                        | 9      | 0.09074              | 0.4126  | ( Probable ANTIGEN )     |  |
| ITWPLLPHV                                                                        | 9      | 0.04904              | 0.6704  | ( Probable ANTIGEN )     |  |
| GLLPFHSTL                                                                        | 9      | 0.01275              | 0.9387  | ( Probable ANTIGEN )     |  |
| FLIPRLPSF                                                                        | 9      | -0.03402             | -0.0001 | ( Probable NON-ANTIGEN ) |  |
| IGSALQFLI                                                                        | 9      | -0.04185             | 0.2352  | ( Probable NON-ANTIGEN ) |  |
| VVCMYLYQL                                                                        | 9      | -0.27904             | 0.6350  | ( Probable ANTIGEN )     |  |
| IQYSSFHSL                                                                        | 9      | -0.28793             | 0.8634  | ( Probable ANTIGEN )     |  |
| YLYQLSPPI                                                                        | 9      | -0.30013             | 0.2734  | ( Probable NON-ANTIGEN ) |  |
