# Supplementary material for: Epitope-based universal vaccine for Human T-lymphotropic virus-1 (HTLV-1)
Source: PubMed Central journal article supplement (PMC8018625; doi:10.1371/journal.pone.0248001), 2021-04-02
Supplement: pone.0248001.s003.pdf [file pone.0248001.s003.pdf]

**Table S3:** B cell epitope:

**Antigenic B cell epitopes (Antigenicity score threshold 0.4)**

| <b>Start</b> | <b>End</b> | <b>Peptide</b>             | <b>Length</b> | <b>Antigenicity</b> | <b>TMHMM</b> | <b>Toxicity</b> |
|--------------|------------|----------------------------|---------------|---------------------|--------------|-----------------|
| 324          | 349        | KEADDNDHEPQISPGGLEPPSEKHFR | 26            | 0.717               | Outside      | No              |
| 252          | 268        | DGTPMISGPCPKDGQPS          | 17            | 0.7207              | Outside      | No              |
| 114          | 126        | PFRNGYMEPTLGQ              | 13            | 0.9083              | Outside      | No              |
| 51           | 62         | EHQITWDPIDGR               | 12            | 1.3783              | Inside       | No              |
| 93           | 104        | PITHTTPNIPPS               | 12            | 0.9582              | Outside      | No              |
| 131          | 141        | LSFPDPGLRPQ                | 11            | 1.3581              | Outside      | No              |
| 77           | 84         | SFPTQRTS                   | 8             | 0.7813              | Inside       | No              |

\*Selected B cell epitopes are marked in highlighted in blue
